# Supplementary material for: Emerging conjugated radical polymer cathodes with ultra-long cycle life for an entire polymer rechargeable battery
Source: Royal Society of Chemistry journal article supplement (doi:10.1039/d2ta01183b), 2022-01-01
Supplement: d2ta01183b1.pdf [file d2ta01183b1.pdf]

## Supporting information

### Emerging Conjugated Radical Polymer Cathode with Ultra-Long Cycle Life for an Entire Polymer Rechargeable Battery

Ying Ou, Yufeng Xiong, Zhengfei Hu, Yang Zhang, Lijie Dong\*

*Center for smart materials and devices, state key laboratory of advanced  
technology for materials synthesis and processing, Wuhan University of  
Technology, Luoshi Road 122, Wuhan 430070, P.R. China*

\*Corresponding authors: Tel: (86) 27-87161730 Fax: (86) 27-87161730

E-mail: [dong@whut.edu.cn](mailto:dong@whut.edu.cn)

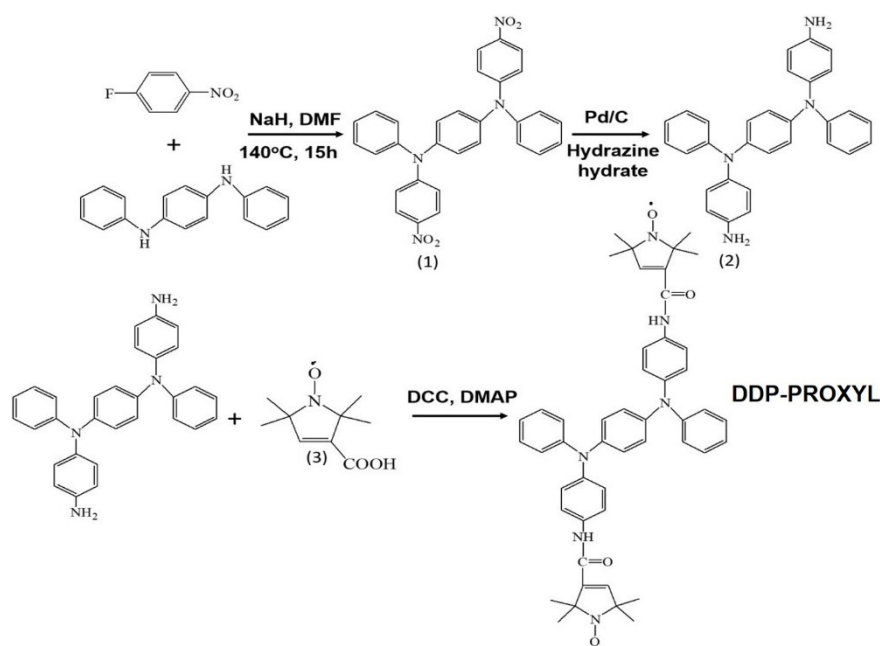

**Figure S1** Synthetic route of the DDP-PROXYL

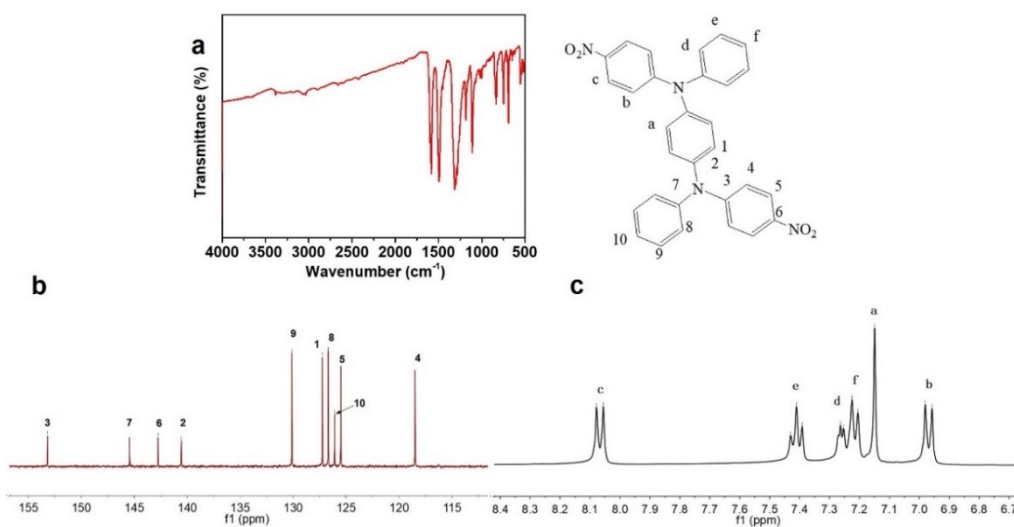

**Figure S2** (a) FTIR, (b)  $^{13}\text{C}$  NMR and (c)  $^1\text{H}$  NMR spectra (400 MHz,  $\text{DMSO-}d_6$ ) of *N,N'*-Bis(4-nitrophenyl)-*N,N'*-diphenyl-1,4-phenylenediamine (DDP- $\text{NO}_2$ )

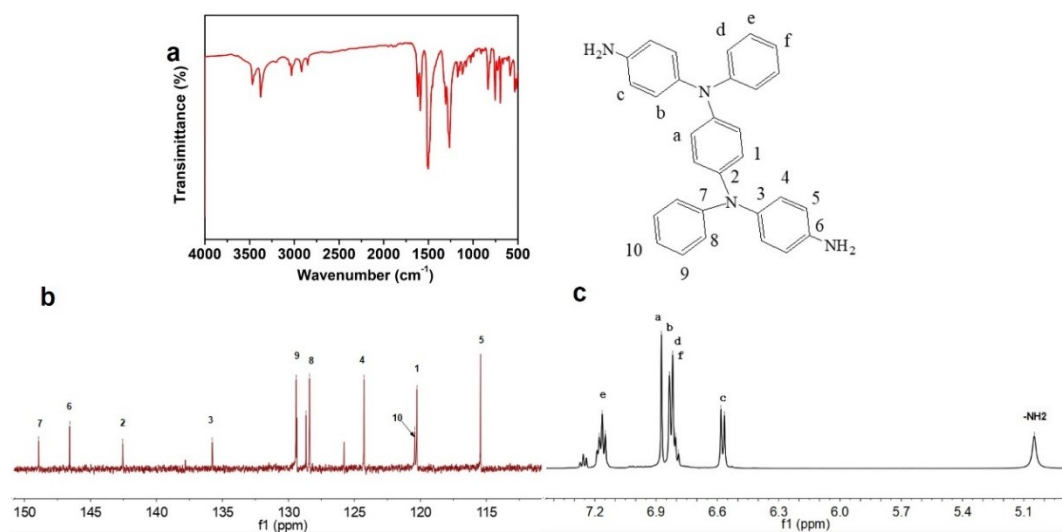

**Figure S3** (a) FTIR, (b)  $^{13}\text{C}$  NMR and (c)  $^1\text{H}$  NMR spectra (400 MHz,  $\text{DMSO-}d_6$ ) of *N,N'*-Bis(4-aminophenyl)-*N,N'*-diphenyl-1,4-phenylenediamine (DDP- $\text{NH}_2$ )

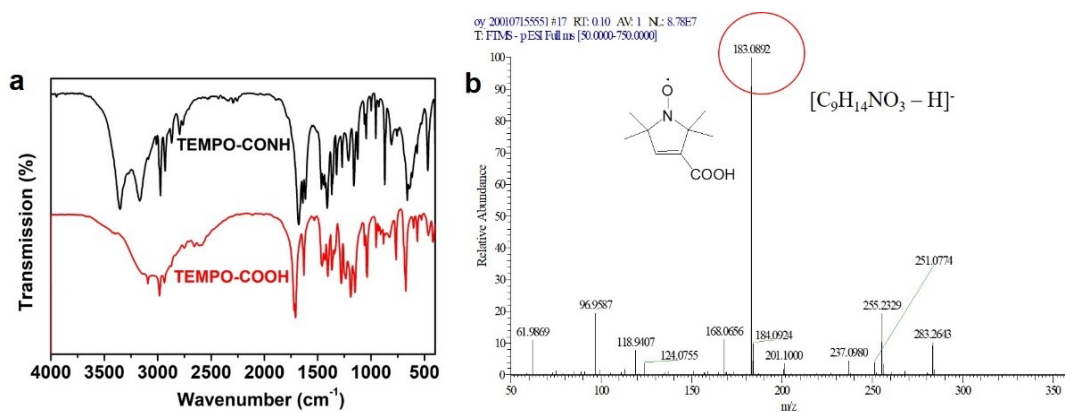

**Figure S4** (a) FTIR, (b) MS (ESI) spectra of 3-carboxy-2,2,5,5-tetramethyl-3-pyrrolin-1-oxyl (PROXYL-COOH)

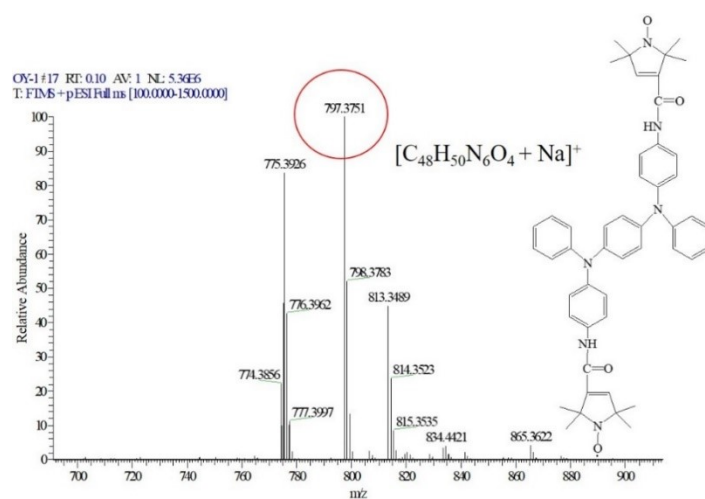

**Figure S5** MS (ESI) spectra of DDP-PROXYL monomer:

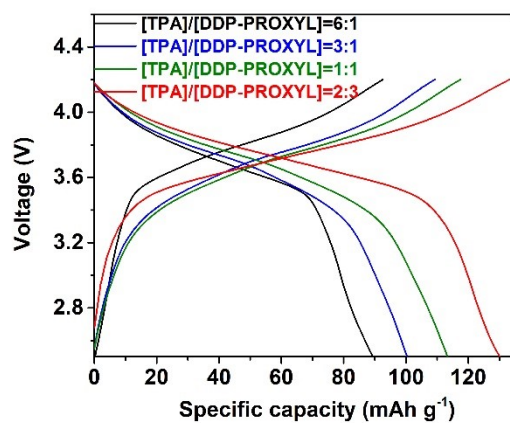

**Figure S6** Galvanostatic charge/discharge curves of P(TPA-co-DDP-PROXYL) copolymer with different mole ratio of [TPA]/[DDP-PROXYL]

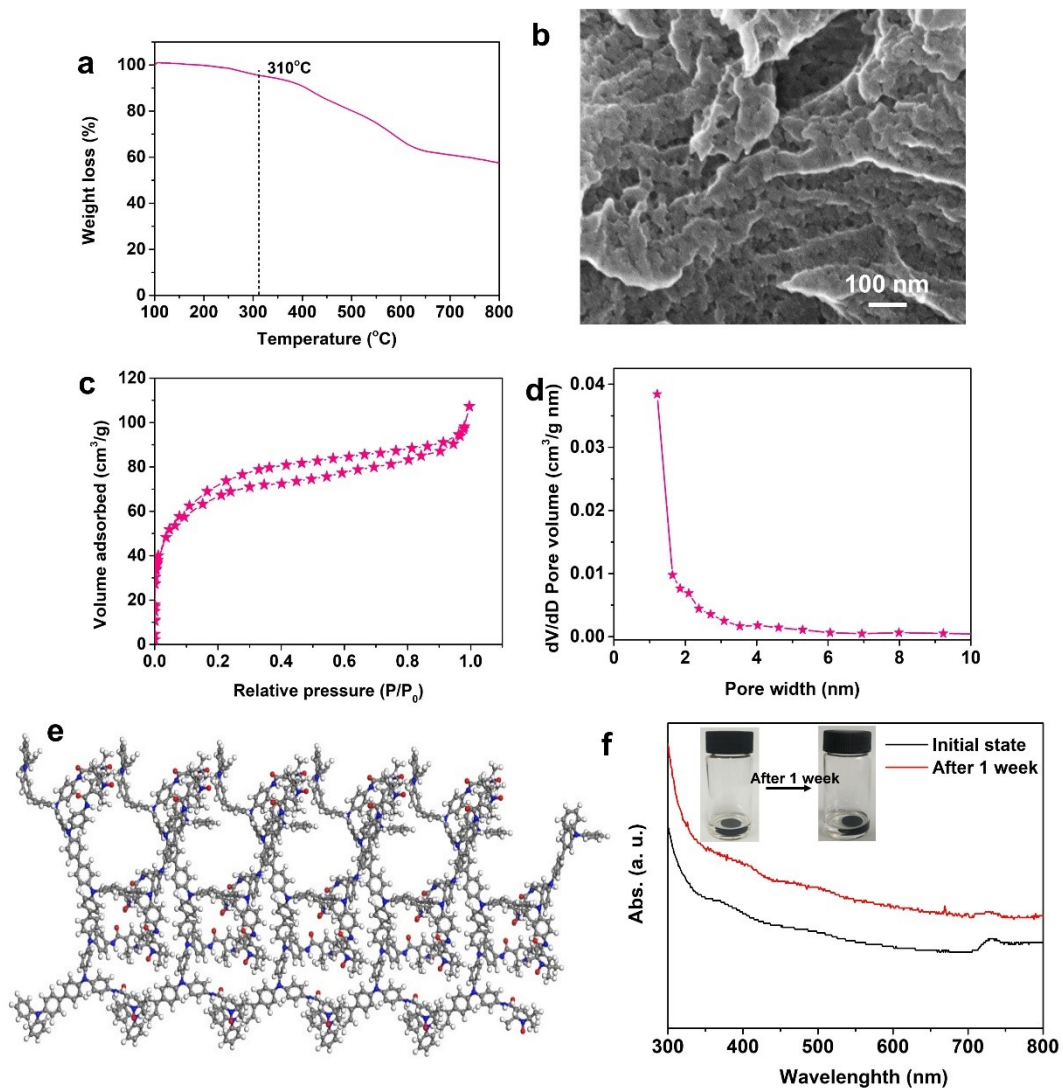

**Figure S7** (a) TGA, (b) SEM image, (c) N<sub>2</sub> sorption isotherms at 77 K, (d) pore size distribution and (e) structure simulation of P(TPA-co-DDP-PROXYL) copolymer. (f) UV spectra of the electrolytes immersed by P(TPA-co-DDP-PROXYL) for 1 week.

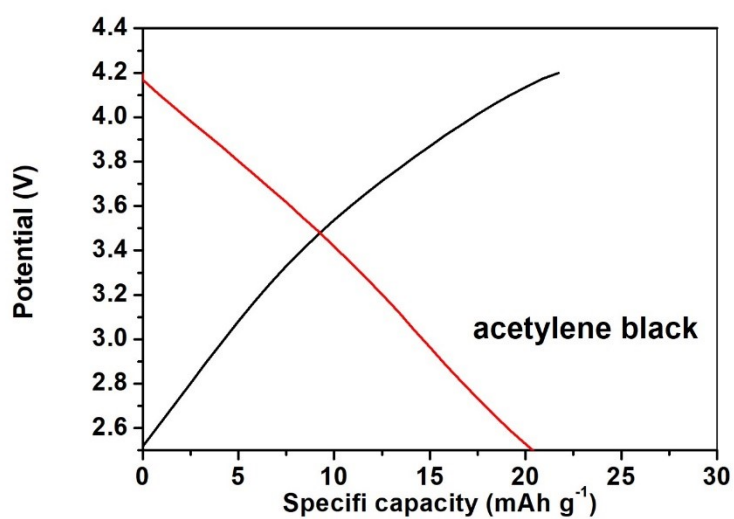

Figure S8 Specific capacity of acetylene black at 20 mA g<sup>-1</sup>.

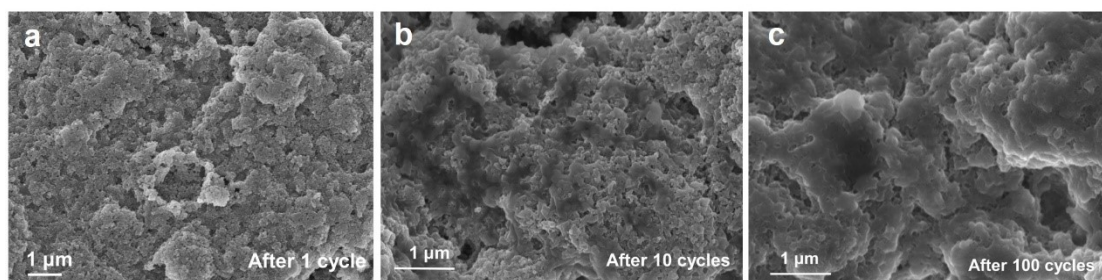

Figure S9 SEM images of P(TPA-co-DDP-PROXYL) electrode with different cycle times at 500 mA g<sup>-1</sup>

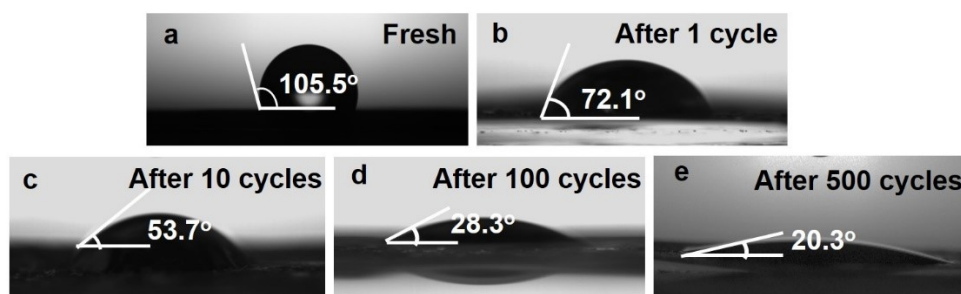

Figure S10 Water contact angle of electrode before and after cycling

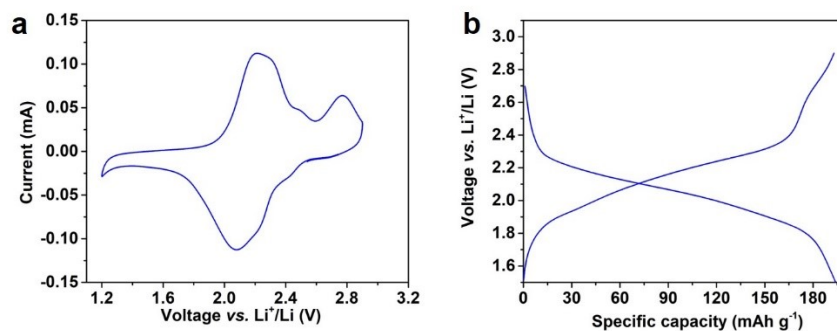

**Figure S11.** CV curve at the scan rate of  $0.5 \text{ mV s}^{-1}$  and (b) galvanostatic charge/discharge curves for the first three cycles at  $20 \text{ mA g}^{-1}$  of PAQS

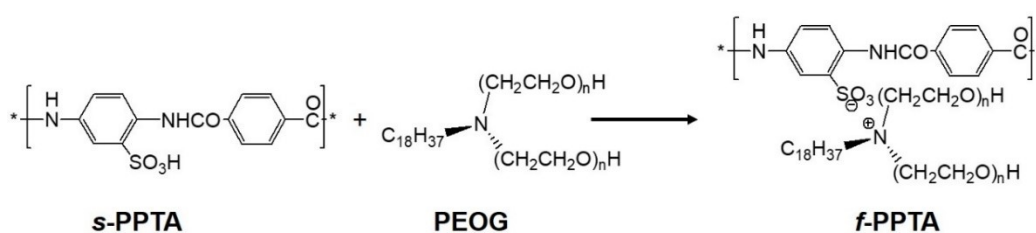

**Figure S12.** The synthesis route of the *f*-PPTA

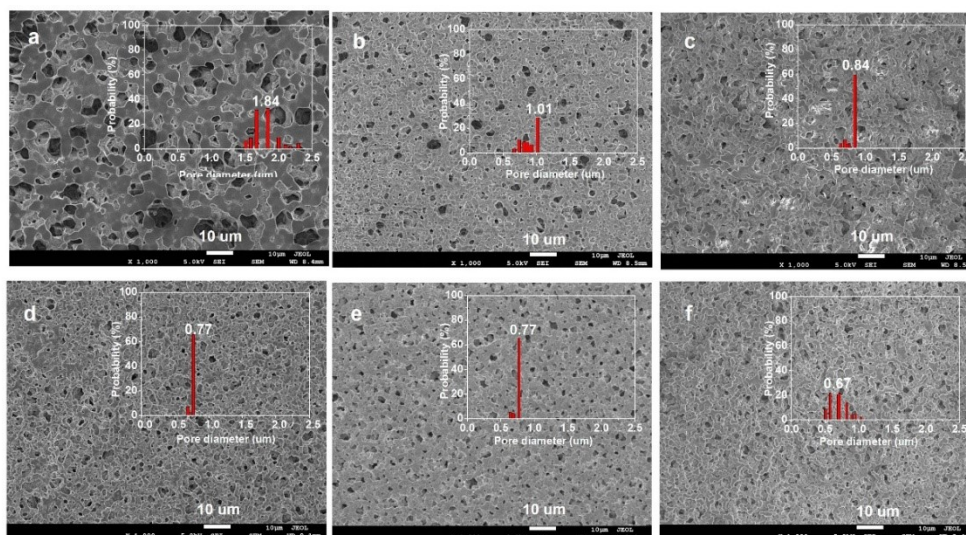

**Figure S13** SEM images and pore size distributions of (a) PVDF-HFP, (b) PVDF-HFP/*f*-PPTA-1, (c) PVDF-HFP/*f*-PPTA-2, (d) PVDF-HFP/*f*-PPTA-3, (e) PVDF-HFP/*f*-PPTA-4 and (f) PVDF-HFP/*f*-PPTA-5

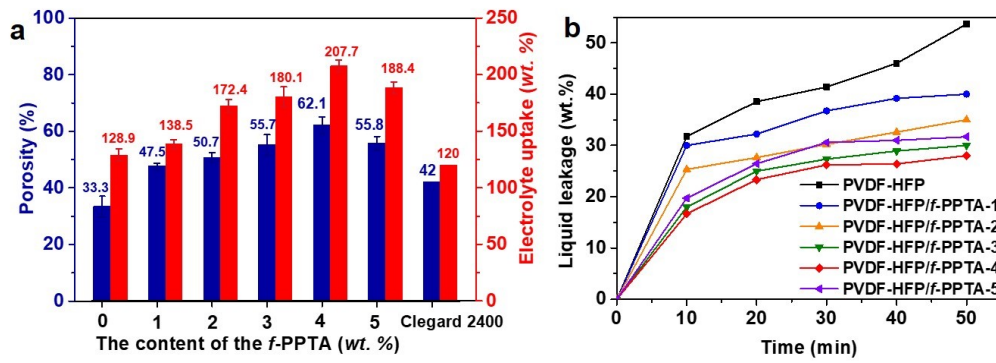

**Figure S14** (a) Porosity and electrolyte uptake analysis, and (b) liquid leakage curve of PVDF-HFP/f-PPTA

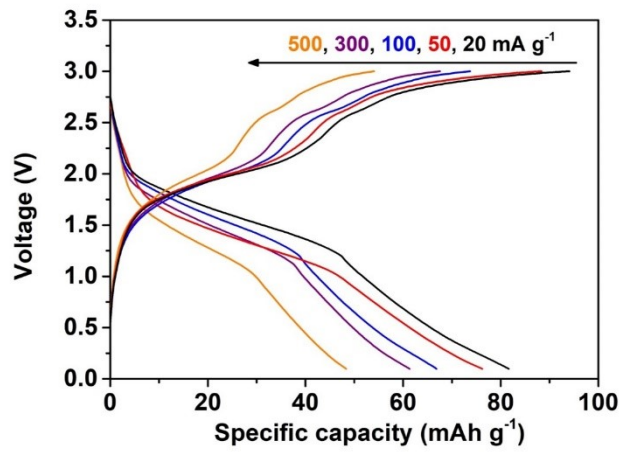

**Figure S15** Charge/discharge profiles at different current density of the entire polymer rechargeable battery

**Table S1.** Electrochemical performance comparison of polymer cathode materials in LIBs

| Samples              | Reversible capacity (mAh g <sup>-1</sup> ) | Rate capability (capacity retention (mAh g <sup>-1</sup> )@current density (mA g <sup>-1</sup> )) | Cyclic life                                                                                  | Discharge voltage (V) | Ref       |
|----------------------|--------------------------------------------|---------------------------------------------------------------------------------------------------|----------------------------------------------------------------------------------------------|-----------------------|-----------|
|                      |                                            |                                                                                                   | capacity retention (mAh g <sup>-1</sup> )@cycle number@current density (mA g <sup>-1</sup> ) |                       |           |
| PTDATA               | 133.1                                      | 90.9@500                                                                                          | 98.2@100@20                                                                                  | 3.6                   | 1         |
| YPTPA                | 105.7                                      | 97.6@2000                                                                                         | 92.9@1170@different current densities                                                        | 3.6                   | 2         |
| PTTPAB               | 87                                         | 84@500                                                                                            | 77@150@100                                                                                   | 3.7                   | 3         |
| DANI-PYR             | 113                                        | 58@1500                                                                                           | 85@180@20<br>60@600@500                                                                      | 3.2                   | 4         |
| PTPA-PO              | 134                                        | 90@500                                                                                            | 121@100@20                                                                                   | 3.8                   | 5         |
| PGVS                 | 104                                        | 40@510                                                                                            | 40@500@510                                                                                   | 3.15                  | 6         |
| PPy-C-TEMPO          | 115                                        | -                                                                                                 | 86@50@20                                                                                     | 3.5                   | 7         |
| PTMA-co-GMA          | 104                                        | 82@550                                                                                            | 103@50@55                                                                                    | 3.6                   | 8         |
| Perylene             | 90                                         | -                                                                                                 | 50@1800@-                                                                                    | 3.8/3.3               | 9         |
| PTPAFc               | 100.2                                      | 90@500                                                                                            | -                                                                                            | 3.6                   | 10        |
| P1a                  | 33                                         | 30@700                                                                                            | 30@30000@700                                                                                 | 3.6                   | 11        |
| p-DPPZ               | 170                                        | 125@200                                                                                           | 125@500@200                                                                                  | 4.1/3.3               | 12        |
| PTMA                 | 104.2                                      | 40@500                                                                                            | 81@100@20                                                                                    | 3.6                   | 13        |
| P(TPA-co-DDP-PROXYL) | 127.3                                      | 100.9@2000                                                                                        | 93.8@3000@500<br>71.2@3000@2000                                                              | 3.7                   | This work |



**Table S2** Porosity, electrolyte uptake and ionic conductivity of P(VDF-HFP)/*f*-PPTA membrane and Clegard 2400

| Sample                       | Ionic conductivity $\sigma$ (mS cm <sup>-1</sup> ) 20°C |
|------------------------------|---------------------------------------------------------|
| P(VDF-HFP)                   | 0.67 (+0.024)                                           |
| P(VDF-HFP)/ <i>f</i> -PPTA-1 | 1.02 (+0.057)                                           |
| P(VDF-HFP)/ <i>f</i> -PPTA-2 | 1.13 (+0.006)                                           |
| P(VDF-HFP)/ <i>f</i> -PPTA-3 | 1.43 (+0.132)                                           |
| P(VDF-HFP)/ <i>f</i> -PPTA-4 | 1.65 (+0.050)                                           |
| P(VDF-HFP)/ <i>f</i> -PPTA-5 | 1.56 (+0.076)                                           |
| Clegard 2400                 | 0.60                                                    |

## References

1. C. Su, H. He, L. Xu, K. Zhao, C. Zheng and C. Zhang, *J. Mater. Chem. A*, 2017, **5**, 2701-2709.
2. C. Zhang, X. Yang, W. Ren, Y. Wang, F. Su and J.-X. Jiang, *J. Power Sources*, 2016, **317**, 49-56.
3. Z. Chen, W. Li, Y. Dai, N. Xu, C. Su, J. Liu and C. Zhang, *Electrochim. Acta*, 2018, **286**, 187-194.
4. C. J. Yao, J. Xie, Z. Wu, Z. J. Xu, S. Zhang and Q. Zhang, *Chem-Asian J*, 2019, **14**, 2210-2214.
5. J. Xiong, Z. Wei, T. Xu, Y. Zhang, C. Xiong and L. Dong, *Polymer*, 2017, **130**, 135-142.
6. T. Suga, H. Ohshiro, S. Sugita, K. Oyaizu and H. Nishide, *Adv. Mater.*, 2009, **21**, 1627-1630.
7. L. Xu, F. Yang, C. Su, L. Ji and C. Zhang, *Electrochim. Acta*, 2014, **130**, 148-155.
8. Shaoyang Wang, *ChemSusChem*, 2020, **13**, 2371-2378.
9. I. A. Rodriguez-Perez, C. Bommier, D. D. Fuller, D. P. Leonard, A. G. Williams and X. Ji, *ACS Appl. Mater. Inter.*, 2018, **10**, 43311-43315.
10. C. Su, Y. Ye, L. Xu and C. Zhang, *J. Mater. Chem.*, 2012, **22**, 22658.
11. P. Acker, L. Rzesny, C. F. N. Marchiori, C. M. Araujo and B. Esser, *Adv. Funct. Mater.*, 2019, **29**, 1906436.
12. G. Dai, X. Wang, Y. Qian, Z. Niu, X. Zhu, J. Ye, Y. Zhao and X. Zhang, *Energy Storage Mater.*, 2019, **16**, 236-242.
13. Y. Ou, Y. Zhang, Y. Xiong, Z. Hu and L. Dong, *Eur. Polym. J.*, 2021, **143**, 110191.
